# Supplementary material for: Scanning mutagenesis of the voltage-gated sodium channel NaV1.2 using base editing
Source: PubMed Central journal article supplement — Cell Rep. Author manuscript; Available in PMC 2023 Oct 23. (PMC10592450; doi:10.1016/j.celrep.2023.112563), 2023-06-01
Supplement: NIHMS1912772-supplement-1.pdf [file NIHMS1912772-supplement-1.pdf]

**Cell Reports, Volume 42**

**Supplemental information**

**Scanning mutagenesis of the voltage-gated sodium  
channel Na<sub>v</sub>1.2 using base editing**

**Juan Lorenzo B. Pablo, Savannah L. Cornett, Lei A. Wang, Sooyeon Jo, Tobias  
Brünger, Nikita Budnik, Mudra Hegde, Jean-Marc DeKeyser, Christopher H.  
Thompson, John G. Doench, Dennis Lal, Alfred L. George Jr., and Jen Q. Pan**

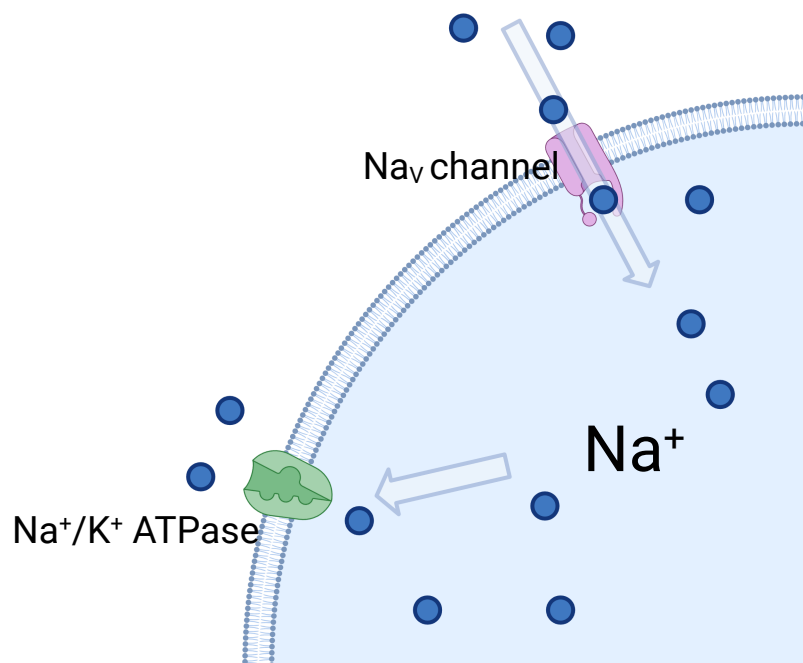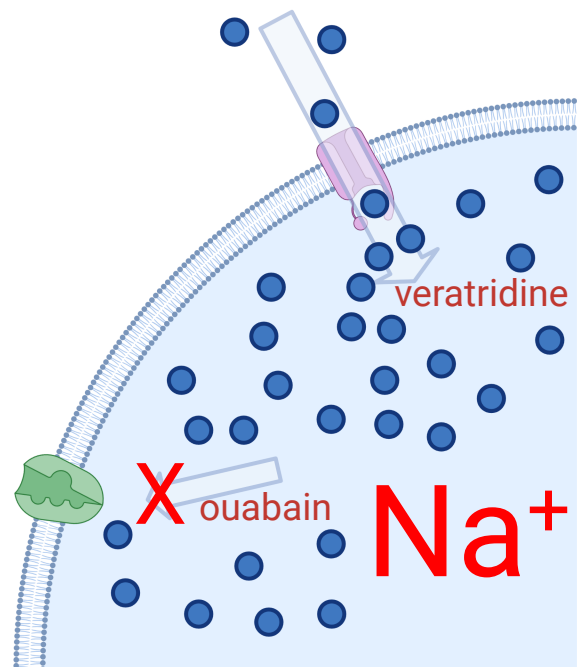

**Supplemental Figure 1. Schematic showing the mechanism of toxicity induced by veratridine and ouabain.** Veratridine increases  $\text{Na}_v1.2$  dependent influx of sodium ions while ouabain blocks sodium ion efflux through the blockade of the  $\text{Na}^+/\text{K}^+$  ATPase. Figure created using Biorender.com.

A

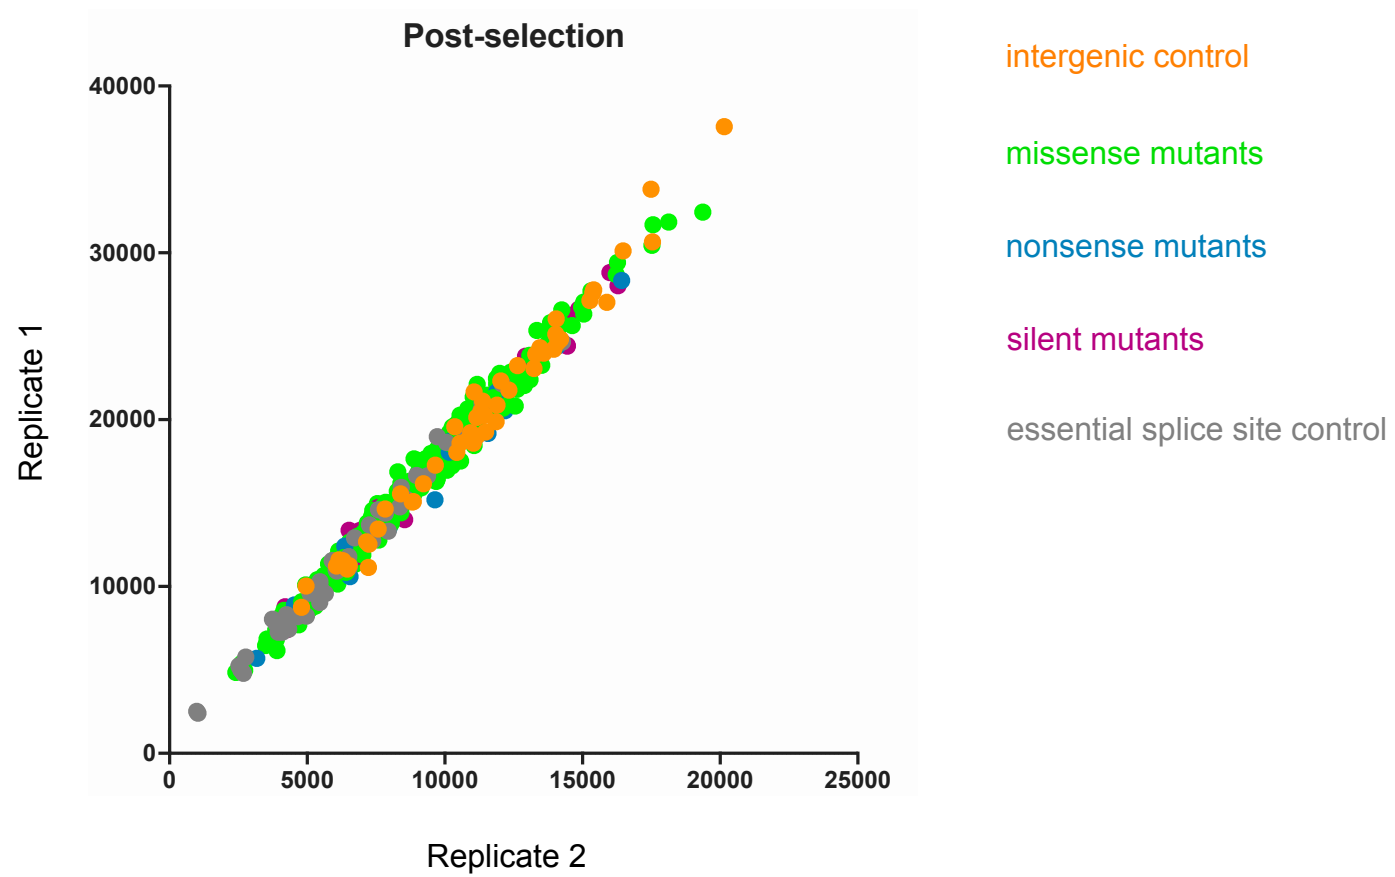

B

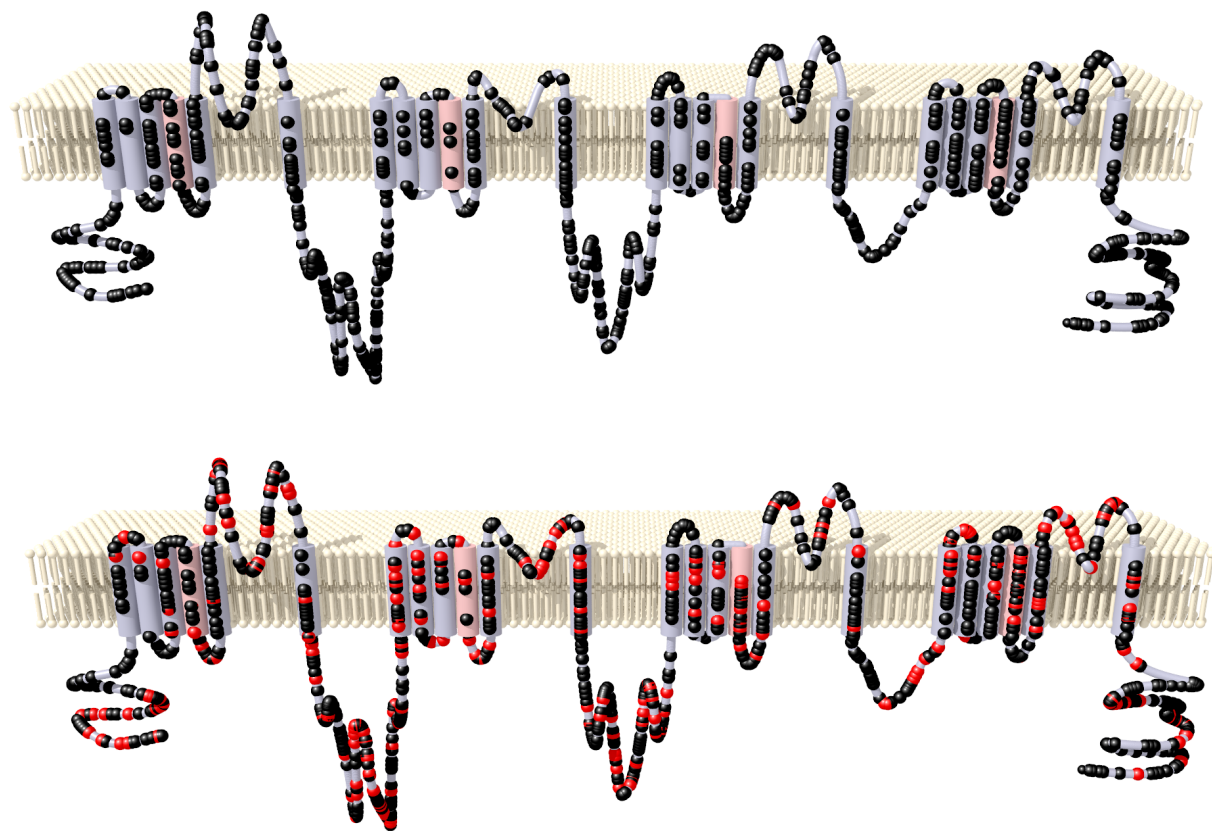

**Supplemental Figure 2. Design of the pooled library for base editing.** A) Scatter plots of sequencing counts for each individual gRNA (colored dot). Two independent replicates of the screen are plotted against each other. The color code for different types of gRNAs is indicated. B) (Top) A membrane topology map of the Na<sub>v</sub>1.2 protein shows the distribution of ClinVar missense variants (as of February 2023). (Bottom) The locations of gRNAs predicted to make missense mutations (red dots) superimposed on the ClinVar missense variants (black dots).

% Reads

orange: sense edit (C-T), purple: predicted edit site(s), red: actual edit site(s)

|                       | no_vo  | vo     | lfc   |
|-----------------------|--------|--------|-------|
| CATCATATCCTTCCTGGTTG  | 31.09% | 23.11% | -0.43 |
| CATTATATTCCTTCCTGGTTG | 11.56% | 13.97% | 0.27  |
| CATTATATCCTTCCTGGTTG  | 5.72%  | 5.39%  | -0.09 |
| CATTATATTTTTCCTGGTTG  | 5.53%  | 6.49%  | 0.23  |
| TATTATATTTTTCCTGGTTG  | 5.19%  | 6.49%  | 0.32  |
| TATTATATTCCTTCCTGGTTG | 3.43%  | 4.06%  | 0.24  |
| CATCATATTCCTTCCTGGTTG | 3.17%  | 3.74%  | 0.24  |
| CATCATATGCTTCCTGGTTG  | 2.02%  | 1.76%  | -0.2  |
| CATCATATACTTCCTGGTTG  | 1.42%  | 1.56%  | 0.13  |
| CATTATATTCCTTCCTGGTTG | 1.36%  | 1.57%  | 0.2   |
| CATGATATCCTTCCTGGTTG  | 1.39%  | 1.36%  | -0.03 |
| CATTATATTTTTCCTGGTTG  | 1.01%  | 1.25%  | 0.3   |

I1761I

% Reads

orange: sense edit (C-T), purple: predicted edit site(s), red: actual edit site(s)

|                      | no_vo  | vo     | lfc   |
|----------------------|--------|--------|-------|
| AAAACTATTTCTGTAATTCC | 45.55% | 45.55% | -0.0  |
| AAAACTATTTCTGTAATTCC | 32.35% | 30.4%  | -0.09 |
| AAAACTATTTCTGTAATTCC | 8.41%  | 8.95%  | 0.09  |
| AAAACTATTTCTGTAATTCC | 2.44%  | 2.53%  | 0.06  |
| AAAACTATTTCTGTAATTCC | 1.6%   | 1.91%  | 0.25  |

T227I

% Reads

green: antisense edit (G-A), purple: predicted edit site(s), red: actual edit site(s)

|                      | no_vo  | vo     | lfc   |
|----------------------|--------|--------|-------|
| ACGCTGGCACATGCATGACT | 8.5%   | 5.33%  | -0.67 |
| ACGCTGGCACATGCATAACT | 53.98% | 55.43% | 0.04  |
| ACGCTGGCACATGCATCACT | 5.88%  | 6.01%  | 0.03  |
| ACGCTGGCACATGCATAACT | 4.33%  | 4.41%  | 0.03  |
| ACGCTGGCACATGCATTACT | 2.99%  | 3.02%  | 0.02  |
| ACGCTGGCACATACATAACT | 2.81%  | 3.18%  | 0.18  |
| ACGCTGGCACATGCATAACT | 1.71%  | 1.77%  | 0.05  |
| ACGCTGGCACATGCATAACT | 1.18%  | 1.35%  | 0.19  |

D927N, M925I

% Reads

green: antisense edit (G-A), purple: predicted edit site(s), red: actual edit site(s)

|                      | no_vo  | vo     | lfc   |
|----------------------|--------|--------|-------|
| TGGAAGCTCAGTTAAAGGAG | 7.07%  | 5.25%  | -0.43 |
| TGGAAGCTCAGTTAAAGGAG | 25.17% | 25.07% | -0.01 |
| TGGAAGCTCAGTTAAAGGAG | 11.73% | 12.14% | 0.05  |
| TGGAAGCTCAGTTAAAGGAG | 6.23%  | 4.95%  | -0.33 |
| TGGAAGCTCAGTTAAAGGAG | 6.06%  | 6.64%  | 0.13  |
| TGGAAGCTCAGTTAAAGGAG | 5.96%  | 6.38%  | 0.1   |
| TGGAAGCTCAGTTAAAGGAG | 4.33%  | 4.56%  | 0.07  |
| TGGAAGCTCAGTTAAAGGAG | 2.1%   | 2.06%  | -0.02 |
| TGGAAGCTCAGTTAAAGGAG | 1.0%   | 1.06%  | 0.09  |

G1744R

% Reads

orange: sense edit (C-T), purple: predicted edit site(s), red: actual edit site(s)

|                      | no_vo  | vo     | lfc   |
|----------------------|--------|--------|-------|
| TCCAGGCCTGAAGACCATTG | 10.64% | 7.45%  | -0.51 |
| TCCAGGCCTGAAGACCATTG | 9.14%  | 10.15% | 0.15  |
| TCCAGGCCTGAAGACCATTG | 7.58%  | 8.66%  | 0.19  |
| TCCAGGCCTGAAGACCATTG | 4.09%  | 4.94%  | 0.27  |
| TCCAGGCCTGAAGACCATTG | 3.87%  | 3.0%   | -0.37 |
| TCCAGGCCTGAAGACCATTG | 3.47%  | 3.55%  | 0.03  |
| TCCAGGCCTGAAGACCATTG | 3.31%  | 3.64%  | 0.14  |
| TCCAGGCCTGAAGACCATTG | 2.92%  | 3.18%  | 0.12  |
| TCCAGGCCTGAAGACCATTG | 2.85%  | 2.6%   | -0.13 |
| TCCAGGCCTGAAGACCATTG | 2.66%  | 2.86%  | 0.11  |
| TCCAGGCCTGAAGACCATTG | 2.55%  | 2.18%  | -0.23 |
| TCCAGGCCTGAAGACCATTG | 2.39%  | 1.83%  | -0.39 |
| TCCAGGCCTGAAGACCATTG | 2.18%  | 2.26%  | 0.05  |
| TCCAGGCCTGAAGACCATTG | 1.81%  | 1.33%  | -0.44 |
| TCCA-----TTG         | 1.71%  | 2.34%  | 0.46  |
| TCCAGGCCTGAAGACCATTG | 1.62%  | 1.61%  | -0.01 |

G223G, L234L

% Reads

orange: sense edit (C-T), purple: predicted edit site(s), red: actual edit site(s)

|                      | no_vo  | vo     | lfc   |
|----------------------|--------|--------|-------|
| CAACAGAAAAAGAAGTTTGG | 59.81% | 47.91% | -0.32 |
| CAACAGAAAAAGAAGTTTGG | 14.03% | 20.61% | 0.55  |
| CAACAGAAAAAGAAGTTTGG | 6.48%  | 6.08%  | -0.09 |
| CAACAGAAAAAGAAGTTTGG | 3.65%  | 6.19%  | 0.76  |
| CAACAGAAAAAGAAGTTTGG | 1.48%  | 2.49%  | 0.75  |

Q1479\*

% Reads

green: antisense edit (G-A), purple: predicted edit site(s), red: actual edit site(s)

|                      | no_vo  | vo     | lfc   |
|----------------------|--------|--------|-------|
| GATCGTGTTCGCGTGCTGT  | 20.33% | 13.14% | -0.63 |
| GATCGTGTTCGCGTAGCTGT | 14.55% | 13.86% | -0.07 |
| GATCGTGTTCGCGTAGCTGT | 10.38% | 8.28%  | -0.33 |
| GATCGTGTTCGCGTAGCTGT | 3.83%  | 4.57%  | 0.25  |
| GATCGTGTTCGCGTAGCTGT | 3.44%  | 4.66%  | 0.44  |

V938I

% Reads

green: antisense edit (G-A), purple: predicted edit site(s), red: actual edit site(s)

|                       | no_vo | vo     | lfc   |
|-----------------------|-------|--------|-------|
| CGTGCTGTGGAGAGTGGGA   | 9.03% | 12.83% | 0.51  |
| CGTGCTGTGTAATAATAATA  | 9.19% | 8.8%   | -0.06 |
| CGTGCTGTGTAATAATAATA  | 7.06% | 6.98%  | -0.02 |
| CGTGCTGTGTAATAATAATA  | 6.63% | 6.57%  | -0.01 |
| CGTGCTGTGTAATAATAATA  | 5.95% | 5.91%  | -0.01 |
| CGTGCTGTGTAATAATAATA  | 4.54% | 4.53%  | -0.0  |
| CGTGCTGTGTAATAATAATA  | 4.39% | 4.36%  | -0.01 |
| CGTGCTGTGT-----       | 2.28% | 2.15%  | -0.08 |
| CGTGCTGTGTAATAAGTGGGA | 1.98% | 1.73%  | -0.19 |

E942K

**Supplemental Figure 3. CRISPResso analysis of all the gRNAs analyzed in the secondary confirmation screen.** The % abundance of each allele in total sequenced reads at each targeting locus without or with drug treatment are shown in column *no\_vo* and *vo* respectively. Negative numbers indicate depletion and positive numbers enrichment. Alleles less frequent than 1% are not shown. Purple letters indicate the predicted edits. Sequence validation reveals edits (intended or unintended) underlying LOF/GOF phenotypes of missense and silent mutations, except for E942K where collateral mutations contributed to complex interpretation. lfc:  $\log_2(\text{fold change})$
